# Supplementary material
Source: HighWire-hosted journal article supplement (https://gpsych.bmj.com/content/32/5/e100051)

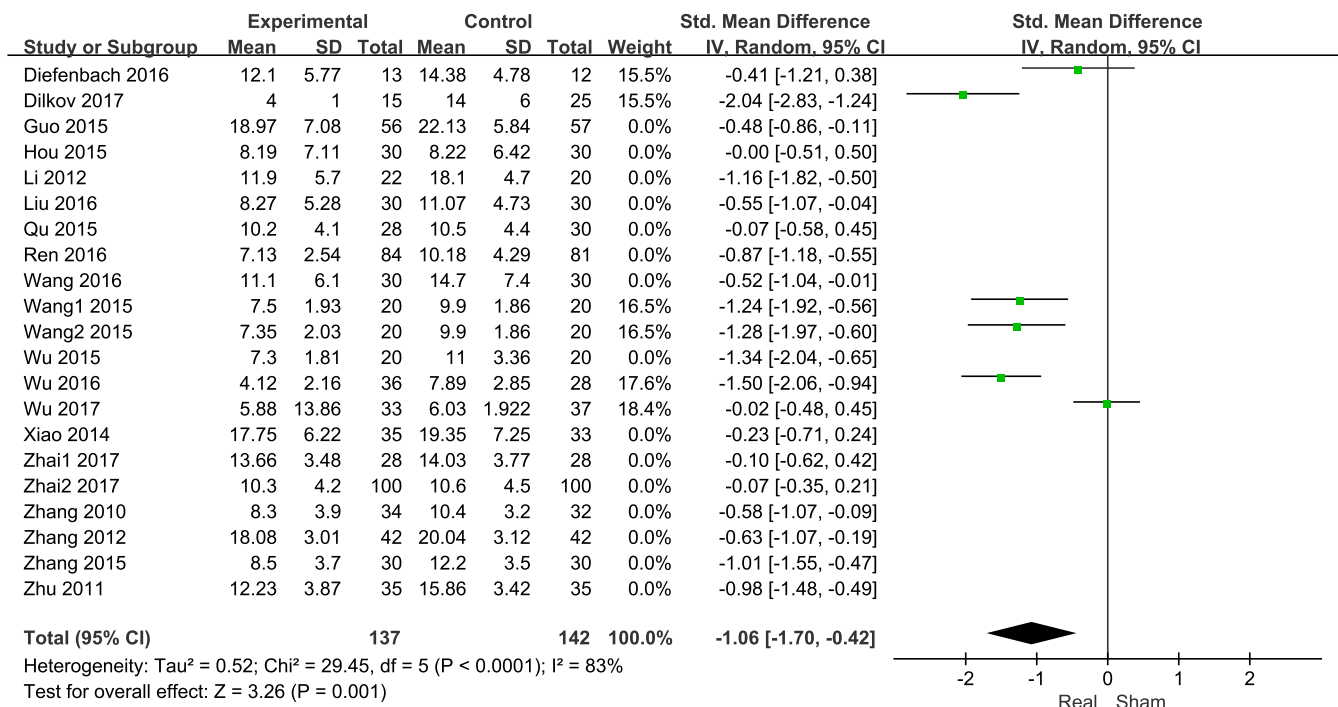

Supplement: inline-supplementary-material-1 [file inline-supplementary-material-1.pdf]

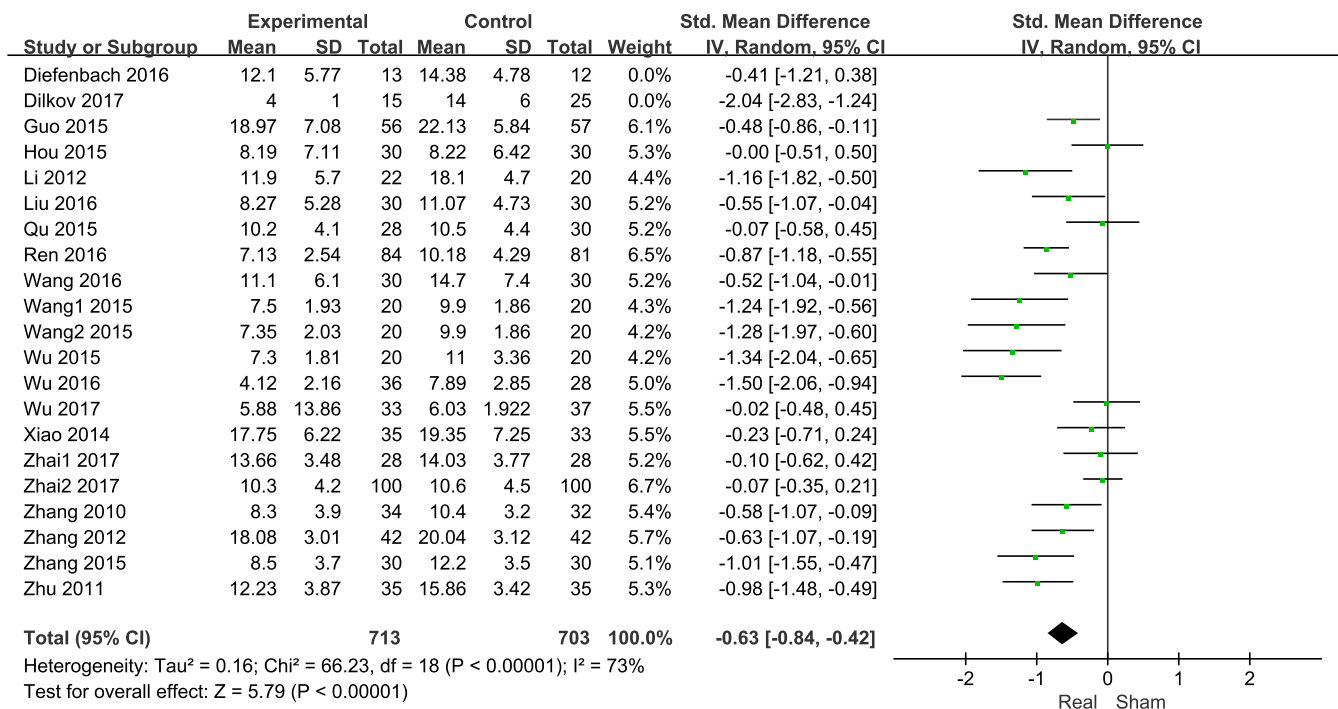

Supplement: inline-supplementary-material-2 [file inline-supplementary-material-2.pdf]
